# Supplementary material
Source: PubMed Central journal article supplement (PMC2778271)
Supplement: NIHMS138749-supplement-01.pdf [file NIHMS138749-supplement-01.pdf]

**Supplemental Table 1.** Primers used for cloning, detection of mutant alleles and RT-PCR.

***gARP5* Clone:**

Clamp KpnI  
Arp5genKpnIS 5' - tag tga ggt acc AAT GAG AGT GTA TAT TGA AAG TGT GAA -3'

Sall  
Arp5genSallA 5' - TTC TCC GTC GAC AAA CTG ATA ACC AAT -3'

Sall  
Arp5genSalS 5' - TAT CAG TTT GTC GAC GGA GAA CCT ATA TAT -3'

Clamp EcoRI  
Arp5genEcoRIA 5' - gtc tag gaa ttc CGA TCT ATA CAG AGG CTA ACT CAA AT -3'

***ARP5* C-Treminal- His cDNA Clone:**

Clamp NcoI  
Arp5-His-S 5' - cat tat cc atg gga AAC CCA GAG TCT TAC TTA GAG GAG TT -3'

Clamp XhoI stop 6-HIS  
Arp5-HIS-A 5' cat tat ctc gag tca atg gtg atg gtg atg gtg CAA ATA GTT GTA TCG AAT  
TTG AT-3'

**RT-PCR primers:**

Arp5rt2S 5'- AGA TCC TGT TCC ATC CAA ACC TT -3'

Arp5rt2A 5'- TGT GCC AGC CAT CTC GTC TA -3'

Arp5rt4S 5'- GCA GAA GAA GCG TCT GAA AAC A -3'

Arp5rt4A 5'- TCG CCC AAT ACC TCC AGA CT -3'

UBQ10rtS 5'- AGA AGT TCA ATG TTT CGT TTC ATG TAA -3'

UBQ10rtA 5'- GAA CGG AAA CAT AGT AGA ACA CTT ATT CA -3'

**Supplemental Table 2.** Phenotypes of nuclear ARP deficient *Arabidopsis* plants.

| Phenotype                                     | ARP defect |      |      |      |
|-----------------------------------------------|------------|------|------|------|
|                                               | ARP4       | ARP5 | ARP6 | ARP7 |
| Small leaves                                  | Yes        | Yes  | Yes  | Yes  |
| Small leaf cells                              | Yes        | Yes  | No   | Yes  |
| Upward curled leaves                          | No         | Yes  | No   | Yes  |
| Excess stomata & delayed stomatal development | No         | Yes  | No   | No   |
| Flower early with long days                   | Yes        | No   | Yes  | No   |
| Flower early with short days                  | No         | No   | Yes  | No   |
| Small flowers/<br>Small floral organs         | Yes        | Yes  | Yes  | Yes  |
| Delayed floral senescence                     | Yes        | No   | No   | Yes  |
| HU hypersensitivity                           | Yes        | Yes  | ND   | ND   |
| MMS hypersensitivity                          | Yes        | Yes  | ND   | ND   |
| Bleomycin hypersensitivity                    | Yes        | Yes  | ND   | ND   |

**Supplemental Figure 1.** *Arp5* promoter sequence used in gene expression (*ARP5p:GUS*) and complementation (*gARP5*) constructs.

aatgagagtg tatattgaaa gtgtgaagtg tgtgaaagag agagagattc  
gtgattcgtg cggaaactct aaaaccctag aataattggt aggttggaga  
agaccgagtg ttaattattg caaggaaaat caaaaggccc aaaactttta  
tataaaatcg caatattaca cattgtccgt tgggcttatac agctggaaaa  
aattggtcgg aatatttcag ttaaagaaaa gcagcaaaaa agacaaccta  
tgtcgggaata cgaaaacgcc gtctgtgggg atcgaacca cggccacgtg  
gttaaaagcc acgcgctcta cactgagct aagacggctt acgtttatgt  
caacgacatt aaactattta ttcaattatc aagtcttttt taagtcagag  
ggttttgggc ctaataatgt tttccacgt cacggagctc catttgtgtc  
ttcttctttc tttcaccgga gaactaggtg gccgaattta cttattacaa  
aatcagtcga tgactgacga cggcgactaa atcaacaccg cagtaggaag  
                  NcoI  
agaaagCCAT GG

The 562 bp promoter sequence spans up to the ATG of the adjacent locus At3g12390.

**Supplemental Figure 2.** Alignment of *Arabidopsis thaliana* (At) ARP5 protein sequence with homologous sequences from human (Hs) and yeast (Sc).

```

AtArp5 ~~~~~~MAFVSRIRRQSDYNTYPSIPIVIDNGASYFRIGWA...
ScArp5 MSSRDASLTPLKAVVIDDPPLRQTPEPFDEQSAVN..POS.PI AIDFGSSKLRAGEV...
HsArp5 ~~~~~~MAANVFPFRDARAAPPDVL EAGPVAHG PLVPLVLDNGSFQVRAGWACPG

AtArp5 ..GETEPRVVFRNIVQRPRHKATGETVTIVGDLDP SMMKYFDCTRS GPRSPFDSNVVYQF
ScArp5 ..NHATPTHIEFNALTKFRDRKLNKNFTFVG..NDTLLD..QAVRSQSRSPFDGPEVTNW
HsArp5 QDPGPEPRLQFRAVCARGRGGARGASGPQVGN A...LGSLEPLRWMLRSPFDRNVPVNL

AtArp5 EIMEYILDYAFDRLG.ANGSGIDHPILITECA CNPVO SRSKMAELLFETYGPAVAFAFGVD
ScArp5 NLTEEILDYTFHHLGVVPDNGIPNPILLTERLATVQSQR TNWYQILFETYNVPGVTFGID
HsArp5 ELQELLLLDYSEQHLEGVSSQGCVDHPIVLT EAVCNPLYSRQMMSELLFCYGI PKVAVGID

AtArp5 AAFS.YKYNQLHGICCKDGI V LCPGF TTHSIPFVDGEP IYKSSRTNIGGYHVTDY LKQ
ScArp5 SLFSFYNYNP.SG..NK TGLVISCGHEDTNVIPVVDGAG I L TDAKRINWGGHQAVDY LND
HsArp5 SLFSFYHNKPKNSMC..SGLIISGYQCTHVL P ILEGR L DAKNCKRINLGGSOAAGYLQR

AtArp5 LLSLKYPFHSSRF TWEKAEDLKL EHCYIAPDYAS..EIRLFOE.GRKEA.....EE
ScArp5 LMALKYPYFPTKMSYLQYETMYKD YCYVSRNYDE..DIEKILT..LENL.....DT
HsArp5 LLQLKYPGH LAAT T LSRMEEILHEHSYIAEDYVEVFPFHN FQNCFF EELHKWRCPDYEN

AtArp5 KTSYWQLPWIPPPT E VPPSEEEIAR KAAI REKQQR LREMAEAKRVSKINDMENQIISR
ScArp5 NDVVVEAPF..TEV LQPQKTEEELRIQAEKRKETGKRLQEQAR LKRMEKLVQKQEEFEYFS
HsArp5 NVHKMQLPFSSKLLGSTLTSEE...KQERRQQQLRRLOELNARRREKQLDQERLDRLL

AtArp5 FLLKQVDQVEEDDIPTFLSDTGYASRQEELESTITKVTQSLRKARGEPKNEPAEYEE NPD S
ScArp5 KVRDQLIDEPKKKVL SVLQ NAGFDDERDFKKV LHSLEOSL KKAQMVEAEDD SHLDEMNED
HsArp5 YVQELLEDDGQMDQFHKALIELNMDSP EELQSYIQKLSI AVEQAKQKILQAEVNL EVDVVD

AtArp5 LNNEKYPLMNV PDDILTPEQLKDKKRQMF LKTTAEGRLR ARQKRNEEELEKEKRNQLEEE
ScArp5 KTAQKFDLLDIADEDLNEDQIK EKRKQRF LKASQDARQAKA KEEKERVAK EEEKKLKEQQ
HsArp5 SKPETPDL EQL E P S L E D V E S M N D . F D P L F S E E T P G V E K P V T T V Q P V F N L A A Y H Q L F V G T E

AtArp5 RRREN...PE S Y L E L Q A Q Y K E V L E R V E Q K K R L . . . . . K T N G S S N G N K S G C I G R G E
ScArp5 WRET D . . . L N G W T K D K R L K L N K L I K R R K E K L K L R D E M K D R K S Q V S Q N R M K N L A S L A E D N
HsArp5 R I R A P E I I F Q P S L I G E E Q A G I A E T L Q Y I L D R Y P K D I Q E M L V Q N V F L T G G N T M Y P G M K A R M

AtArp5 RLSAAQRERMRLLTTA AFD R G K G E D T . F G S R D E D W O L Y K L M S K D N D D D D E Q P D S D E A E L A
ScArp5 VKQGAQRNRHQ...ATIDNDP.NDT.FGAND EDWLT YTDITQ NPEAFEEALEY EYKDIV
HsArp5 EKELLEMRPFRSSFQVQLASNPVLD AWYGAR..DWA LNH L..DNEVWITRKEYEKGGE

AtArp5 RLSSRLQE..IDPTFVQK..VEGELSQTS.....GEVPRVRPLTEEDYKIVIGIERF
ScArp5 ELERLLLE..HDPNFTEEDTLEAQYDWRNSILHLFLRGPRPHDSENIHEQHQMHLNVERI
HsArp5 YLKEHCASNIYVPIRLPKQASRSSDAQASSKGSAAAGGGGAGEQA~~~~~

AtArp5 RCPEILFHPNLIGIDQVGLDEMAGT.SIRRLPHDEKELEER...LTSSILMTGGCSLLPG
ScArp5 RVPEVIFQPTMGGQDQAGICE LSETILLKKFGSQPGRLSQTSIDMVNNVLIITGGNAKVPG
HsArp5 ~~~~~~

AtArp5 MNERLECGIRMIRPCGSPINVRAMDPVLD AWRGASAF AAN.LNFLGN AFTKMDYDEKGE
ScArp5 LKERIVKEFTGFLPTGTNITVNMSSDPSLD A W K G M A L A R N E E Q Y R K T V I S K K E Y E Y G P
HsArp5 ~~~~~~

AtArp5 DWLRNYQI.RYNYL~~
ScArp5 EYIKEHKLGNTKYFED
HsArp5 ~~~~~~

```
